# Supplementary material
Source: HighWire-hosted journal article supplement (https://ebmtp.com/highwire/filestream/136132/field_highwire_adjunct_files/0/lee_85_1950.pdf)
Supplement: lee_85_1950.pdf [file lee_85_1950.pdf]

# 适量酒精摄入可降低韩国人缺血性卒中的风险

Soo Joo Lee, MD, PhD; Yong-Jin Cho, MD, PhD; Jae Guk Kim, MD; Youngchai Ko, MD; Keun-Sik Hong, MD, PhD;  
Jong-Moo Park, MD, PhD; Kyusik Kang, MD, PhD; Tai Hwan Park, MD, PhD; Sang-Soon Park, MD;  
Kyung Bok Lee, MD, PhD; Jae Kwan Cha, MD, PhD; Dae-Hyun Kim, MD, PhD; Jun Lee, MD, PhD;  
Joon-Tae Kim, MD, PhD; Juneyoung Lee, PhD; Ji Sung Lee, PhD; Myung Suk Jang, AD; Moon-Ku Han, MD, PhD;  
Philip B. Gorelick, MD, MPH; Hee-Joon Bae, MD, PhD; On behalf of the CRCS-5 Investigators

**目的：**我们的研究是一项基于人群的病例对照研究，以西方人群为参照，调查偏好不同类型酒精饮料的韩国人酒精摄入量与缺血性卒中风险之间的剂量反应关系，以及性别与缺血性脑卒中亚型的关系。

**方法：**纳入年龄为 $\geq 20$ 岁且首次发生缺血性卒中的患者 ( $n = 1,848$ )。无卒中的对照组来自于第四次和第五次韩国国家健康和营养检测调查，并按照年龄( $\pm 3$ 岁)、性别、受教育程度与病例组进行匹配。所有受试者都要完成关于酒精摄入的结构式问卷调查。

**结果：**校正潜在混杂因素后，少量至适度的酒精摄入、每日3或4次(1次 = 10g乙醇)饮酒与缺血性卒中低发生率有明显相关性(0次：作为参照； $< 1$ 次：比值比 0.38, 95%可信区间 0.32~0.45；1~2次：0.45, 0.36~0.57；3~4次：0.54, 0.39~0.74)。女性的酒精效应的阈值略低于男性(女性高达1~2次 vs 男性3~4次)，但这种差别无统计学意义。酒精摄入量与缺血性卒中亚型间无统计学交互作用( $p = 0.50$ )。最频繁使用的酒精饮料是产自韩国本土的烧酒(78%的病例)，是一种乙醇含量为20%的蒸馏型饮料。

**结论：**我们的结果提示，少量至适度的蒸馏型酒精摄入可降低韩国人缺血性卒中的风险。 *Neurology*® 2015;85:1950-1956
